# Supplementary material
Source: HighWire-hosted journal article supplement (https://www.cmajopen.ca/highwire/filestream/81286/field_highwire_adjunct_files/2/2019-0053-3-at.pdf)
Supplement: 2019-0053-3-at.pdf [file 2019-0053-3-at.pdf]

**Appendix 3 (as provided by the authors): Table describing the characteristics of the 13 Family Medicine Groups or clinics**

| Clinic number                | Type of clinic               | Region       | Number of registered patients | FTE physicians | Pre (October 1 <sup>st</sup> to July 1 <sup>st</sup> ) | Post (October 1 <sup>st</sup> to July 1 <sup>st</sup> ) |
|------------------------------|------------------------------|--------------|-------------------------------|----------------|--------------------------------------------------------|---------------------------------------------------------|
| 1                            | Community                    | Urban        | 8217                          | 20             | 2011-2012                                              | 2014-2015                                               |
| 2                            | University-Affiliated        | Urban        | 8016                          | 14             | 2012-2013                                              | 2014-2015                                               |
| 3                            | Community                    | Urban        | 26408                         | 42             | 2012-2013                                              | 2014-2015                                               |
| 4                            | Community                    | Urban        | 16696                         | 17.7           | 2012-2013                                              | 2014-2015                                               |
| 5                            | University-Affiliated        | Urban        | 15900                         | 15.8           | 2011-2012                                              | 2014-2015                                               |
| 6                            | University-Affiliated        | Rural        | 28714                         | 32             | 2011-2012                                              | 2014-2015                                               |
| 7                            | Community                    | Rural        | 32000                         | 35             | 2011-2012                                              | 2014-2015                                               |
| 8                            | University-Affiliated        | Urban        | 11258                         | 17.5           | 2012-2013                                              | 2014-2015                                               |
| 9                            | University-Affiliated        | Rural        | 18200                         | 18             | 2011-2012                                              | 2014-2015                                               |
| 10                           | University-Affiliated        | Rural        | 6483                          | 5              | 2012-2013                                              | 2014-2015                                               |
| 11                           | Community                    | Urban        | 9080                          | 5              | 2011-2012                                              | 2014-2015                                               |
| 12                           | Community                    | Urban        | 18900                         | 15             | 2012-2013                                              | 2014-2015                                               |
| 13                           | University-Affiliated        | Urban        | 35000                         | 16             | 2011-2012                                              | 2014-2015                                               |
| <b>Summary</b>               |                              |              |                               |                |                                                        |                                                         |
| <i>% or Median</i>           | Community: 46.2%             | Urban: 69.2% | 16696                         | 18             | -                                                      | -                                                       |
| <i>(Interquartile Range)</i> | University-Affiliated: 53.8% | Rural: 30.8% | (9,080; 26,408)               | (15; 20)       | -                                                      | -                                                       |

FTE=Full-time equivalent. Pre=before the Quebec Alzheimer Plan. Post=after the Quebec Alzheimer Plan.
